# Supplementary material for: Estimation of Children’s Soil and Dust Ingestion Rates and Health Risk at E-Waste Dismantling Area
Source: MDPI journal article supplement (doi:10.3390/ijerph19127332), 2022-06-15
Supplement: s1 [file s1]

## Supporting Information

### Estimation of Children's Soil and Dust Ingestion Rates and health risk in E-Waste

#### Dismantling area

Yan Yang<sup>a,b,c\*</sup>, Mengdi Zhang<sup>a</sup>, Haojia Chen<sup>a,b,c</sup>, Zenghua Qi<sup>a</sup>, Chengcheng Liu<sup>b</sup>, Qiang Chen<sup>d</sup>, Tao Long<sup>d</sup>

<sup>a</sup>School of Environmental Science and Engineering, Institute of Environmental Health and Pollution Control, Guangdong University of Technology, Guangzhou, 510006, Guangdong, PR China

<sup>b</sup>Chemistry and Chemical Engineering Guangdong Laboratory, Shantou, 515041, Guangdong, PR China

<sup>c</sup>Synergy Innovation Institute of GDUT, Shantou, 515041, Guangdong, PR China

<sup>d</sup>State Environmental Protection Key Laboratory of Soil Environmental Management and Pollution Control, Nanjing Institute of Environmental Sciences, Ministry of Ecology and Environment of China, Nanjing, Jiangsu, China

\*Corresponding author:

Yan Yang, Ph.D.

Rm 502, Engineering Facility Building No.3

Department of Environmental Science and Engineering

Guangdong University of Technology

Guangzhou, PR China

Tel: 020-39322564

Fax: 020-39322564

E-mail: yangyan1209@gdut.edu.cn

**There are 10 pages including 4 figures and 6 tables.**

## ■ Table of Contents

| Items                                                                                                                                                               | Pages    |
|---------------------------------------------------------------------------------------------------------------------------------------------------------------------|----------|
| <b>Figure S1.</b> Histogram and basic statistical parameters of investigated child population age, height, and weight.                                              | Page S3  |
| <b>Figure S2.</b> Histogram and basic statistical parameters of daily food ingestion (FOww) and feces (FCdw) and urine excretion for investigated child population. | Page S4  |
| <b>Figure S3.</b> Histogram and basic statistical parameters of daily food ingestion (FOww) and feces (FCdw) and urine excretion for investigated child population. | Page S5  |
| <b>Figure S4.</b> Frequency distribution histogram and outlier box of soil ingestion rate (SIR) based on tracer Al, Ba, Ce, Mn, Sc, Ti, V, and Y separately.        | Page S6  |
| <b>Table S1.</b> Basic statistical parameters of tracer element concentrations in food.                                                                             | Page S7  |
| <b>Table S2.</b> Basic statistical parameters of tracer element concentrations in faeces.                                                                           | Page S8  |
| <b>Table S3.</b> Basic statistical parameters of tracer element concentrations in urine.                                                                            | Page S9  |
| <b>Table S4.</b> Heavy metal concentration in soil of residential area.                                                                                             | Page S10 |
| <b>Table S5.</b> Heavy metal concentration in soil of parks and green areas.                                                                                        | Page S11 |
| <b>Table S6.</b> Value significance of carcinogenic risk and non-carcinogenic risk.                                                                                 | Page S12 |

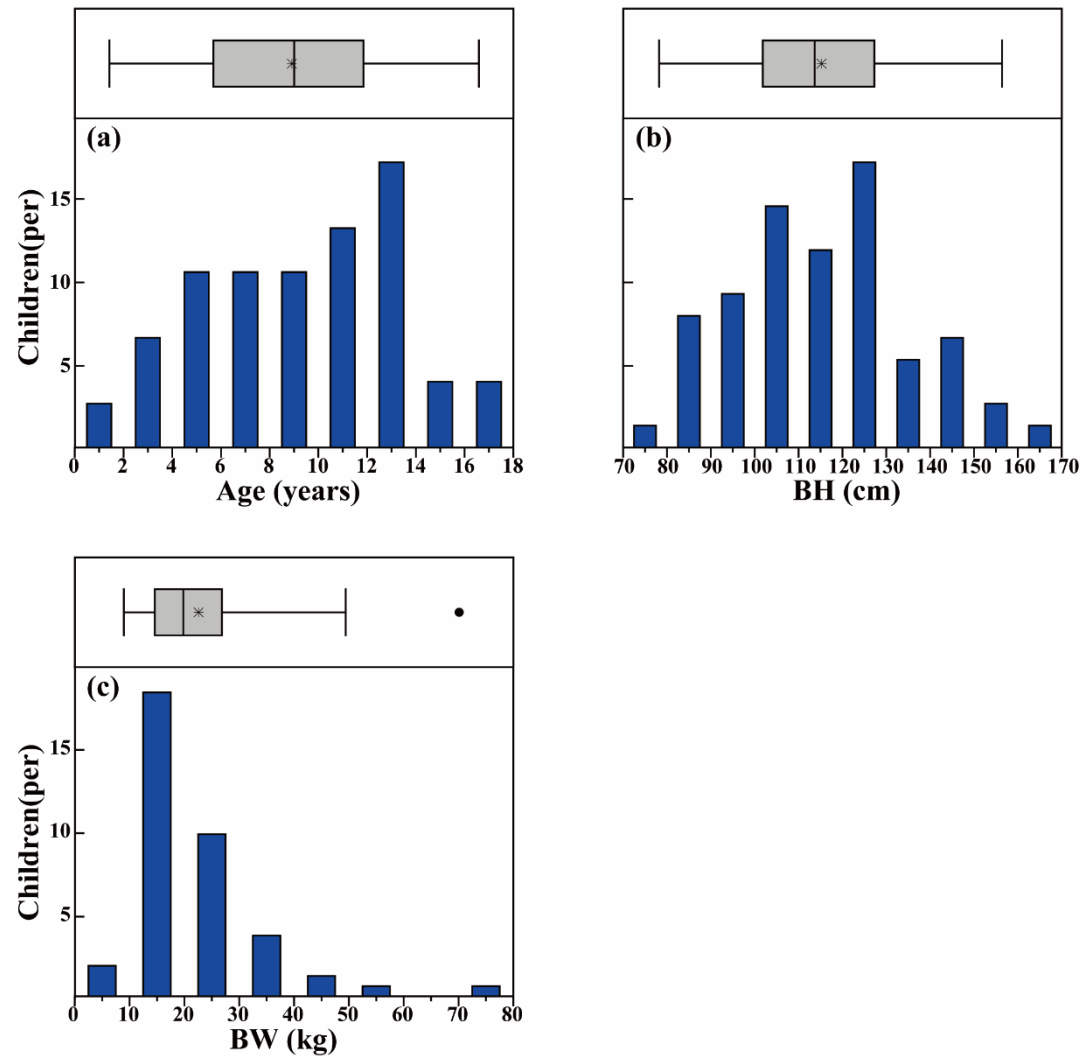

**Figure S1.** Histogram and basic statistical parameters of investigated child population age (a), height (b), and weight (c). The \* represents mean values, and dot sign represents outliers.

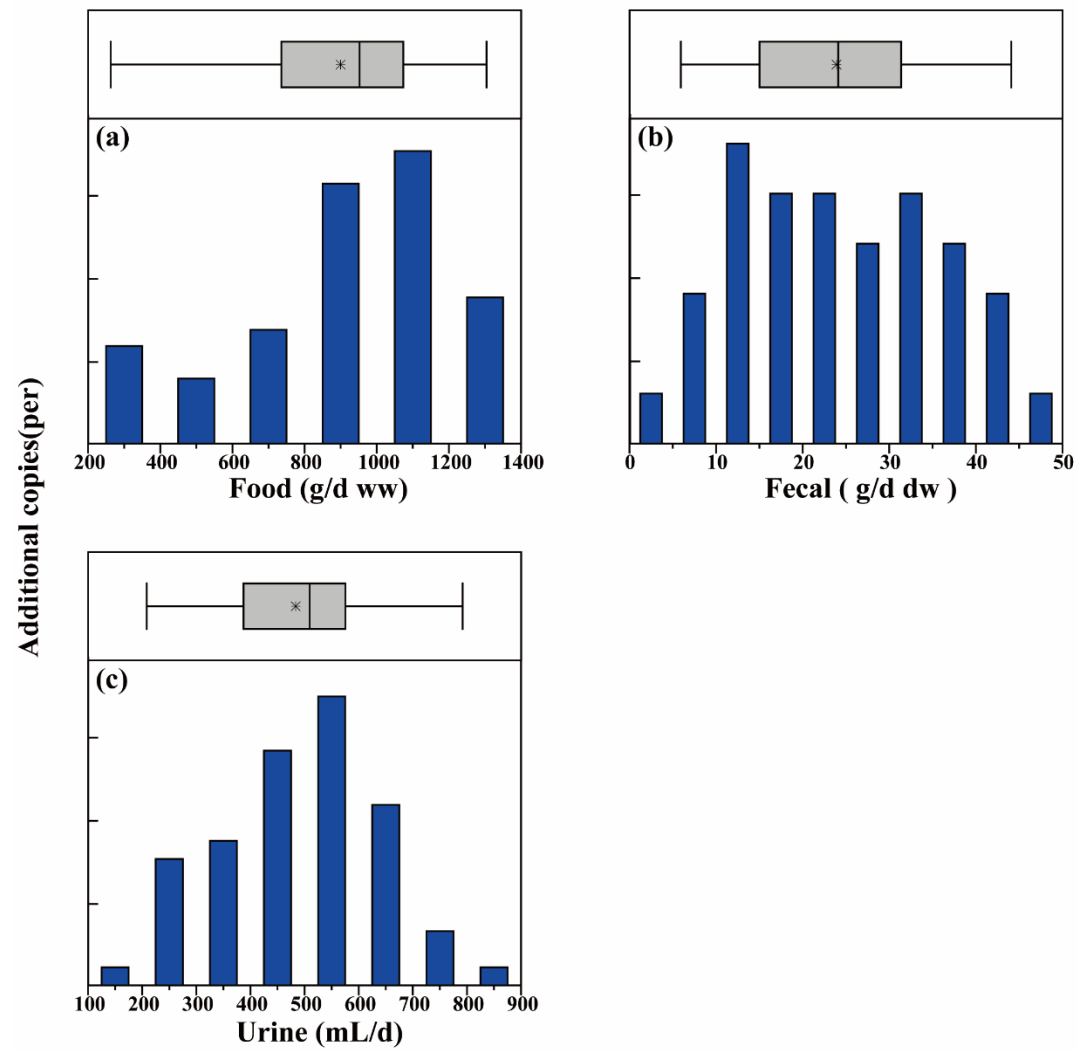

**Figure S2.** Histogram and basic statistical parameters of daily food ingestion **(a)** (g/d, ww) and feces **(b)** (g/d, dw) and urine **(c)** (mL/d) excretion for investigated child population. The \* represents mean values.

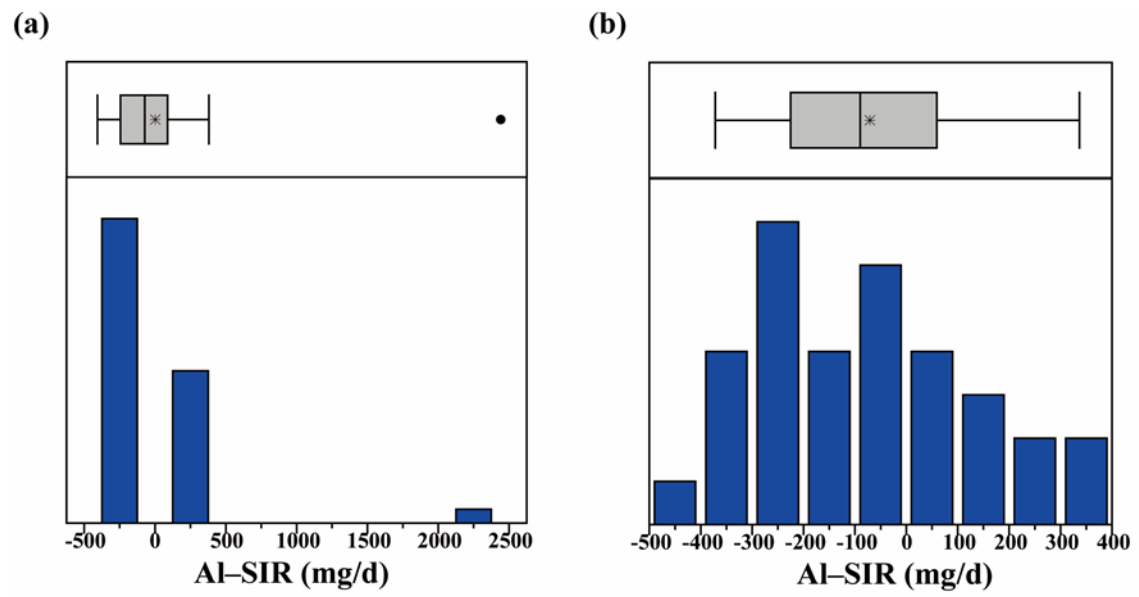

**Figure S3.** Frequency distribution histogram and outlier box (a) and Frequency distribution histogram and outlier box (b) of soil ingestion rate (SIR) based on Al. The \* represents mean values, and dot sign represents outliers.

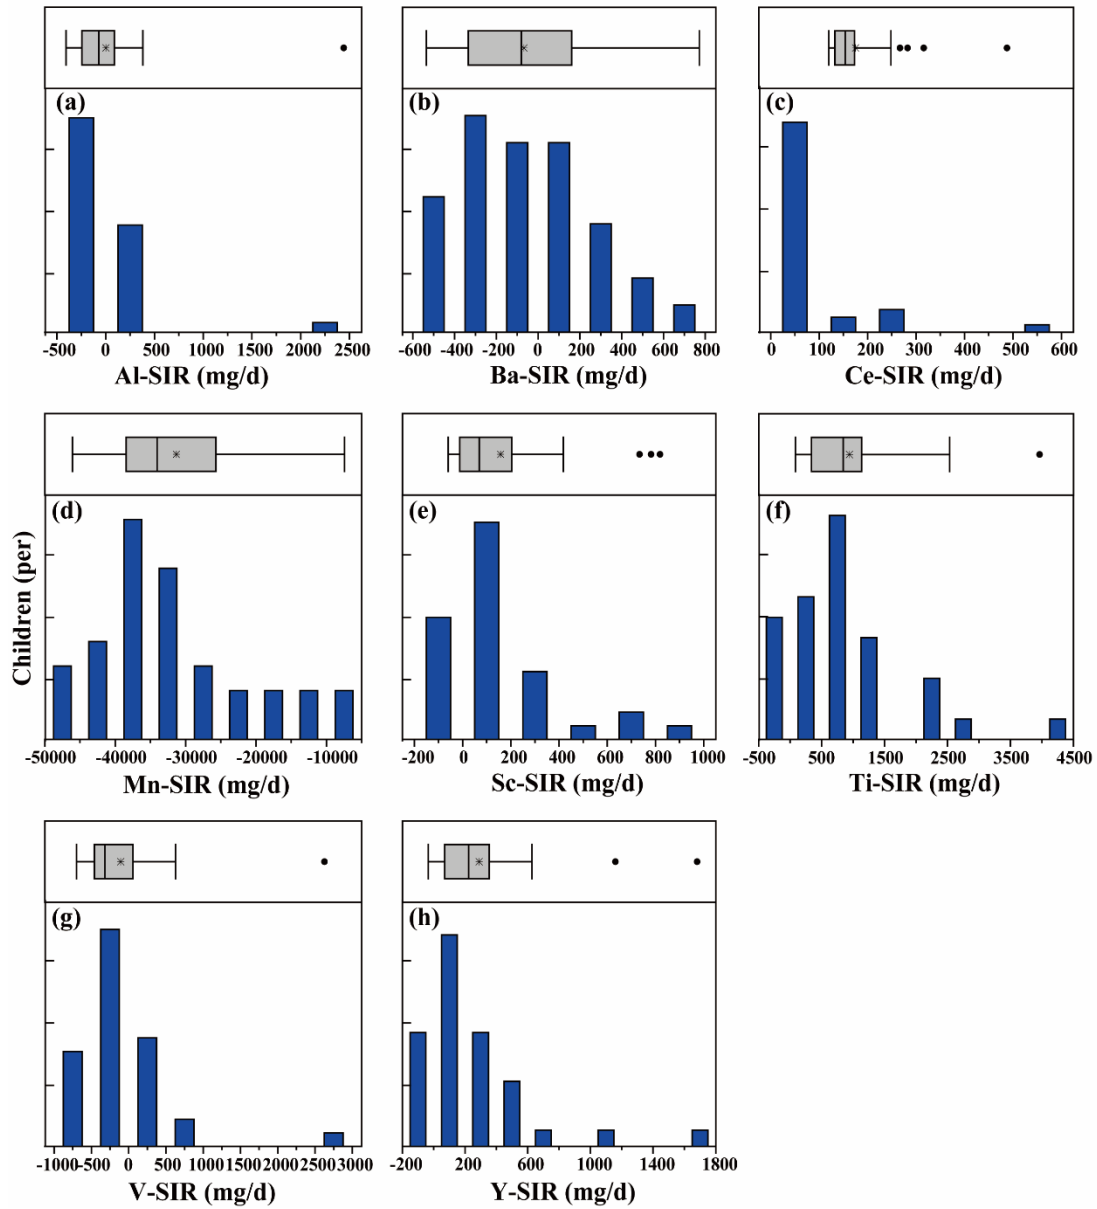

**Figure S4.** Frequency distribution histogram and outlier box of soil ingestion rate (SIR) based on tracer Al (a), Ba (b), Ce (c), Mn (d), Sc (e), Ti (f), V (g), and Y (h) separately. The \* represents mean values, and dot sign represents outliers.

**Table S1.** Basic statistical parameters of tracer element concentrations in faeces.

|        | <b>Al</b>    | <b>Ba</b>    | <b>Ce</b>    | <b>Mn</b>    | <b>Sc</b>    | <b>Ti</b>    | <b>V</b>     | <b>Y</b>     |
|--------|--------------|--------------|--------------|--------------|--------------|--------------|--------------|--------------|
|        | <b>mg/kg</b> |
| Max    | 1487.32      | 11.03        | 1.08         | 73.67        | 0.46         | 548.73       | 2.04         | 0.76         |
| 99.5%  | 1479.59      | 10.97        | 1.07         | 70.30        | 0.43         | 463.33       | 2.01         | 0.68         |
| 97.5%  | 1426.15      | 10.73        | 1.04         | 57.35        | 0.34         | 141.74       | 1.90         | 0.37         |
| 95.0%  | 957.72       | 10.47        | 1.03         | 51.98        | 0.19         | 134.37       | 1.58         | 0.35         |
| 90.0%  | 742.83       | 9.55         | 0.82         | 50.49        | 0.12         | 113.56       | 1.14         | 0.29         |
| 75.0%  | 494.92       | 7.71         | 0.44         | 41.43        | 0.08         | 80.63        | 0.85         | 0.18         |
| Median | 265.74       | 5.28         | 0.25         | 31.04        | 0.05         | 55.54        | 0.64         | 0.12         |
| 25.0%  | 208.93       | 3.12         | 0.17         | 21.41        | 0.03         | 27.99        | 0.48         | 0.08         |
| 10.0%  | 139.29       | 1.74         | 0.09         | 7.68         | 0.01         | 21.53        | 0.36         | 0.06         |
| 2.5%   | 90.29        | 1.46         | 0.06         | 6.42         | 0.01         | 11.14        | 0.20         | 0.04         |
| 0.5%   | 114.97       | 1.47         | 0.07         | 6.57         | 0.01         | 15.70        | 0.31         | 0.04         |
| Min    | 61.56        | 1.12         | 0.04         | 6.20         | 0.00         | 10.55        | 0.17         | 0.03         |
| n      | 62           | 62           | 62           | 62           | 62           | 62           | 62           | 62           |

**Table S2.** Basic statistical parameters of tracer element concentrations in urine.

|        | <b>Al</b>   | <b>Ba</b>   | <b>Ce</b>   | <b>Mn</b>   | <b>Sc</b>   | <b>Ti</b>   | <b>V</b>    | <b>Y</b>    |
|--------|-------------|-------------|-------------|-------------|-------------|-------------|-------------|-------------|
|        | <b>mg/L</b> | <b>mg/L</b> | <b>µg/L</b> | <b>mg/L</b> | <b>µg/L</b> | <b>µg/L</b> | <b>µg/L</b> | <b>µg/L</b> |
| Max    | 900.00      | 0.00        | 1.30        | 0.00        | 1.10        | 181.00      | 6.90        | 0.00        |
| 99.5%  | 786.00      | 0.00        | 1.21        | 0.00        | 1.07        | 164.47      | 6.04        | 0.00        |
| 97.5%  | 457.50      | 0.00        | 0.64        | 0.00        | 0.91        | 122.58      | 3.86        | 0.00        |
| 95.0%  | 400.00      | 0.00        | 0.15        | 0.00        | 0.72        | 122.00      | 3.72        | 0.00        |
| 90.0%  | 100.00      | 0.00        | 0.15        | 0.00        | 0.15        | 2.50        | 0.25        | 0.00        |
| 75.0%  | 100.00      | 0.00        | 0.15        | 0.00        | 0.15        | 74.50       | 2.45        | 0.00        |
| Median | 100.00      | 0.00        | 0.15        | 0.00        | 0.15        | 45.00       | 1.15        | 0.00        |
| 25.0%  | 100.00      | 0.00        | 0.15        | 0.00        | 0.15        | 74.50       | 2.45        | 0.00        |
| 10.0%  | 100.00      | 0.00        | 0.15        | 0.00        | 0.15        | 17.70       | 0.25        | 0.00        |
| 2.5%   | 100.00      | 0.00        | 0.15        | 0.00        | 0.15        | 30.25       | 0.80        | 0.00        |
| 0.5%   | 100.00      | 0.00        | 0.15        | 0.00        | 0.15        | 5.21        | 0.25        | 0.00        |
| Min    | 100.00      | 0.00        | 0.15        | 0.00        | 0.15        | 2.50        | 0.25        | 0.00        |
| n      | 64          | 64          | 64          | 64          | 64          | 64          | 64          | 64          |



**Table S3.** Basic statistical parameters of tracer element concentrations in food.

|        | <b>Al</b>    | <b>Ba</b>    | <b>Ce</b>    | <b>Mn</b>    | <b>Sc</b>    | <b>Ti</b>    | <b>V</b>     | <b>Y</b>     |
|--------|--------------|--------------|--------------|--------------|--------------|--------------|--------------|--------------|
|        | <b>µg/kg</b> |
| Max    | 15500.00     | 490.00       | 0.50         | 12000.00     | 0.50         | 360.00       | 25.00        | 1.00         |
| 99.5%  | 15462.00     | 486.80       | 0.50         | 11998.00     | 0.50         | 359.30       | 25.00        | 1.00         |
| 97.5%  | 15310.00     | 474.00       | 0.50         | 11990.00     | 0.50         | 356.50       | 25.00        | 1.00         |
| 95.0%  | 15120.00     | 458.00       | 0.50         | 11980.00     | 0.50         | 353.00       | 25.00        | 1.00         |
| 90.0%  | 14740.00     | 426.00       | 0.50         | 11960.00     | 0.50         | 346.00       | 25.00        | 1.00         |
| 75.0%  | 13600.00     | 330.00       | 0.50         | 11900.00     | 0.50         | 325.00       | 25.00        | 1.00         |
| Median | 11700.00     | 170.00       | 0.50         | 11800.00     | 0.50         | 290.00       | 25.00        | 1.00         |
| 25.0%  | 10750.00     | 90.00        | 0.50         | 10850.00     | 0.50         | 285.00       | 16.00        | 1.00         |
| 10.0%  | 10180.00     | 42.00        | 0.50         | 10280.00     | 0.50         | 282.00       | 10.60        | 1.00         |
| 2.5%   | 9895.00      | 18.00        | 0.50         | 9995.00      | 0.50         | 280.50       | 7.90         | 1.00         |
| 0.5%   | 9819.00      | 11.60        | 0.50         | 9919.00      | 0.50         | 280.10       | 7.18         | 1.00         |
| Min    | 9800.00      | 10.00        | 0.50         | 9900.00      | 0.50         | 280.00       | 7.00         | 1.00         |
| n      | 66           | 66           | 66           | 66           | 66           | 66           | 66           | 66           |

**Table S4.** Heavy metal concentration in soil of residential area.

| Sample | Cr     | Ni     | Cu     | Zn      | As    | Cd   | Pb     |
|--------|--------|--------|--------|---------|-------|------|--------|
|        | mg/kg  |        |        |         |       |      |        |
| 1      | 69.65  | 28.02  | 97.97  | 199.09  | 5.34  | 0.56 | 32.58  |
| 2      | 28.31  | 8.48   | 20.07  | 42.54   | 4.19  | 0.11 | 58.36  |
| 3      | 36.47  | 11.56  | 9.62   | 48.90   | 4.80  | 0.07 | 56.91  |
| 4      | 29.28  | 10.86  | 31.21  | 107.58  | 6.76  | 0.31 | 99.02  |
| 6      | 28.63  | 9.78   | 23.96  | 75.52   | 4.17  | 0.20 | 48.22  |
| 7      | 37.98  | 17.97  | 59.98  | 96.36   | 6.18  | 0.55 | 108.96 |
| 8      | 65.19  | 47.17  | 229.12 | 227.18  | 8.48  | 0.21 | 139.78 |
| 9      | 27.22  | 11.62  | 26.17  | 69.03   | 4.25  | 0.33 | 85.39  |
| 10     | 13.85  | 4.94   | 13.18  | 40.62   | 3.19  | 0.09 | 52.77  |
| 11     | 31.50  | 24.02  | 77.37  | 167.51  | 4.88  | 0.90 | 36.89  |
| 12     | 22.73  | 5.50   | 8.97   | 68.52   | 2.49  | 0.14 | 30.39  |
| 13     | 19.49  | 14.62  | 47.92  | 103.81  | 2.73  | 0.45 | 62.85  |
| 14     | 21.43  | 18.25  | 16.26  | 50.92   | 4.58  | 0.18 | 60.43  |
| 15     | 51.05  | 7.66   | 57.10  | 141.51  | 4.59  | 0.35 | 48.82  |
| 16     | 132.61 | 292.00 | 192.65 | 2714.06 | 17.67 | 0.66 | 191.19 |
| 17     | 90.91  | 239.93 | 171.89 | 1840.02 | 13.95 | 0.55 | 274.59 |
| 18     | 25.50  | 142.72 | 170.44 | 202.00  | 13.55 | 0.50 | 136.77 |
| 19     | 49.97  | 18.23  | 32.83  | 104.16  | 3.38  | 0.23 | 67.81  |
| 20     | 15.43  | 6.85   | 27.06  | 36.59   | 4.30  | 0.12 | 68.66  |
| 21     | 50.26  | 7.57   | 15.43  | 91.01   | 3.62  | 0.29 | 39.87  |
| 22     | 36.87  | 6.39   | 11.75  | 61.42   | 2.89  | 0.16 | 73.23  |
| 23     | 50.26  | 7.57   | 15.43  | 91.01   | 3.62  | 0.29 | 39.87  |
| 24     | 29.98  | 49.50  | 87.75  | 131.61  | 5.83  | 0.40 | 65.05  |

**Table S5.** Heavy metal concentration in soil of parks and green areas.

| Sample | Cr     | Ni     | Cu     | Zn      | As    | Cd   | Pb     |
|--------|--------|--------|--------|---------|-------|------|--------|
|        | mg/kg  |        |        |         |       |      |        |
| 1      | 61.42  | 27.70  | 141.39 | 230.87  | 5.12  | 0.78 | 56.51  |
| 2      | 46.69  | 20.69  | 60.29  | 133.53  | 6.51  | 0.55 | 15.00  |
| 3      | 58.12  | 20.49  | 77.44  | 86.31   | 5.66  | 0.66 | 46.19  |
| 4      | 38.35  | 17.34  | 76.56  | 117.74  | 4.91  | 0.63 | 34.35  |
| 5      | 92.91  | 57.83  | 206.56 | 225.88  | 6.31  | 0.12 | 100.48 |
| 6      | 35.14  | 19.72  | 265.61 | 310.21  | 4.62  | 0.62 | 79.02  |
| 7      | 28.74  | 11.53  | 26.74  | 41.09   | 4.62  | 0.42 | 72.82  |
| 8      | 28.96  | 13.71  | 50.22  | 74.85   | 8.88  | 0.30 | 82.34  |
| 9      | 43.88  | 25.27  | 79.11  | 122.50  | 5.79  | 0.36 | 78.06  |
| 10     | 71.30  | 237.89 | 115.33 | 369.92  | 10.38 | 0.63 | 29.45  |
| 11     | 87.98  | 441.29 | 448.52 | 2908.13 | 13.09 | 1.40 | 388.54 |
| 12     | 69.49  | 176.36 | 117.02 | 1872.23 | 4.28  | 1.32 | 373.36 |
| 13     | 121.51 | 263.08 | 563.12 | 2401.51 | 12.10 | 1.36 | 536.61 |
| 14     | 15.81  | 7.51   | 28.90  | 63.38   | 2.55  | 0.20 | 62.24  |
| 15     | 28.43  | 9.62   | 58.56  | 88.21   | 3.59  | 0.29 | 43.88  |
| 16     | 55.84  | 8.11   | 14.10  | 64.50   | 2.51  | 0.13 | 42.92  |
| 17     | 69.24  | 22.03  | 162.77 | 320.70  | 4.35  | 0.87 | 45.66  |
| 18     | 36.87  | 6.39   | 11.75  | 61.42   | 2.89  | 0.16 | 73.23  |
| 19     | 23.98  | 48.30  | 189.83 | 176.45  | 2.76  | 0.39 | 35.52  |
| 20     | 50.26  | 7.57   | 15.43  | 91.01   | 3.62  | 0.29 | 39.87  |

**Table S6.** Value significance of carcinogenic risk and non-carcinogenic risk.

|                            | <b>Not damage</b> | <b>Likely damage</b> | <b>Serious damage</b> |
|----------------------------|-------------------|----------------------|-----------------------|
| carcinogenic risk          | $< 10^6$          | $10^6 < x < 10^4$    | $10^4 <$              |
| non-carcinogenic risk (HQ) | $< 1$             | $1 < x < 10$         | $10 <$                |
